# Supplementary material for: Gut Microbiota, Metabolome, and Body Composition Signatures of Response to Therapy in Patients with Advanced Melanoma
Source: MDPI journal article supplement (doi:10.3390/ijms241411611), 2023-07-18
Supplement: s1 [file s1]

## Supplementary material

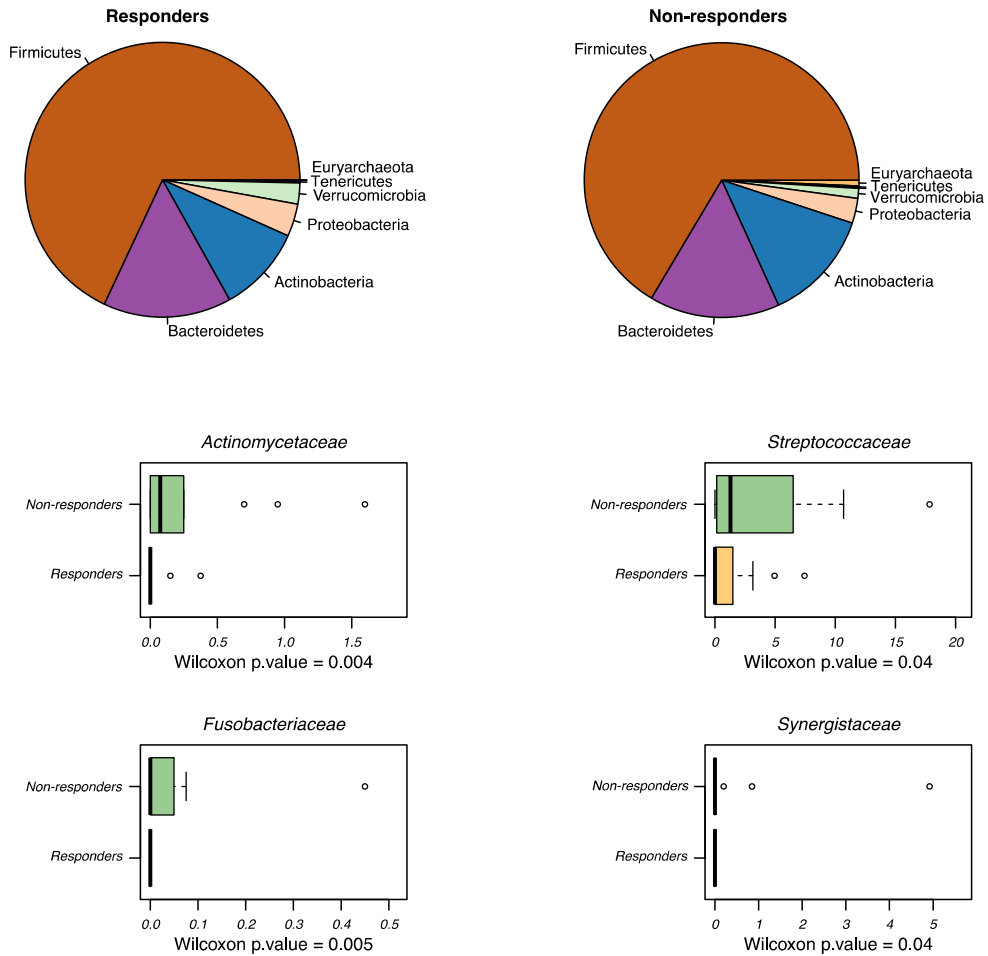

**Figure S1. Baseline phylum- and family-level composition of the gut microbiota in advanced melanoma patients in relation to therapeutic response.**

Top, Pie charts representing the phylum-level composition of the gut microbiota of responders and non-responders. Bottom, Boxplots showing the relative abundance distribution of families differentially represented between groups ( $p \leq 0.05$ , Wilcoxon test).

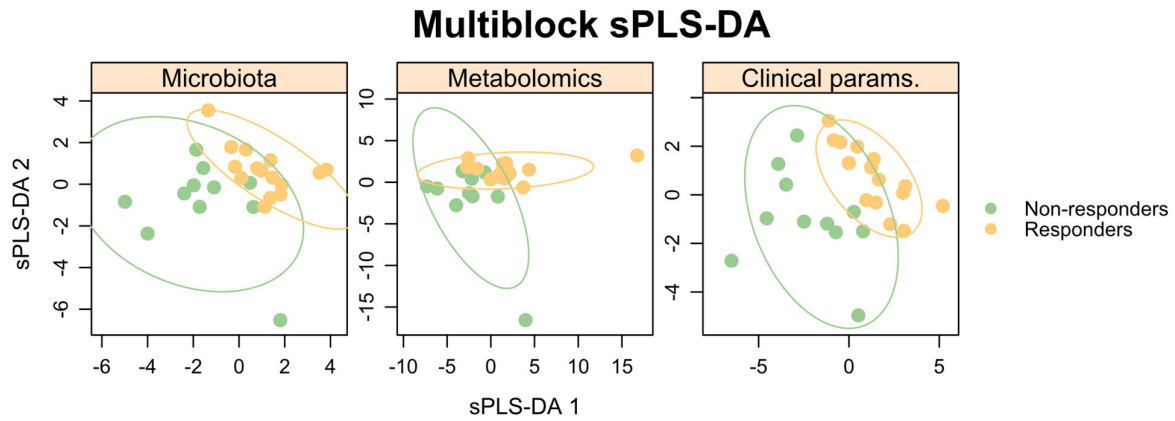

**Figure S2. Sparse Partial Least Squares Discriminant Analysis of omics (microbiomics and metabolomics) data and patient metadata at baseline.**

Multiblock analysis of baseline stratified data allowed to evaluate the contribution of each block to the distribution of samples in the non-responder and responder groups, scoring all of them as discriminant of the outcome. For clinical parameters, neutrophil to lymphocyte ratio and body composition data were used.
